# Supplementary material for: Cell-free circulating DNA integrity is an independent predictor of impending breast cancer recurrence
Source: PubMed Central journal article supplement (PMC5589601; doi:10.18632/oncotarget.17384), 2017-04-24
Supplement: oncotarget-08-54537-s001.pdf [file oncotarget-08-54537-s001.pdf]

# Cell-free circulating DNA integrity is an independent predictor of impending breast cancer recurrence

## SUPPLEMENTARY FIGURES AND TABLES

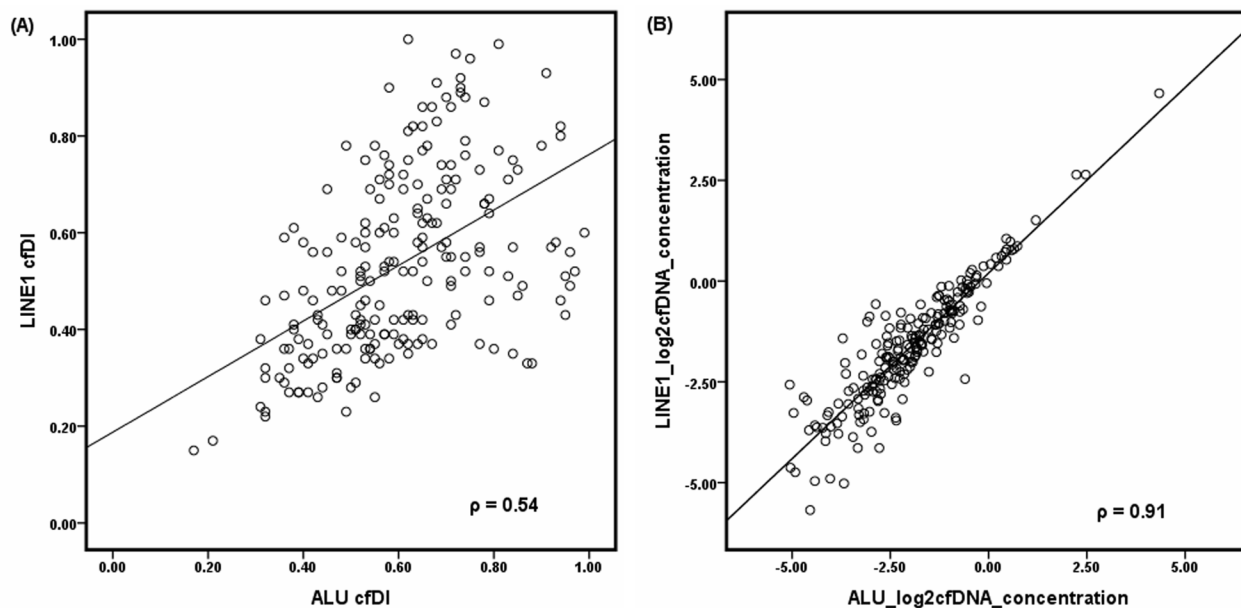

**Supplementary Figure 1:** Correlation of (A) cell-free DNA integrity (cfDI) and (B) cell-free DNA (cfDNA) concentration estimated from ALU and LINE1 repetitive elements.

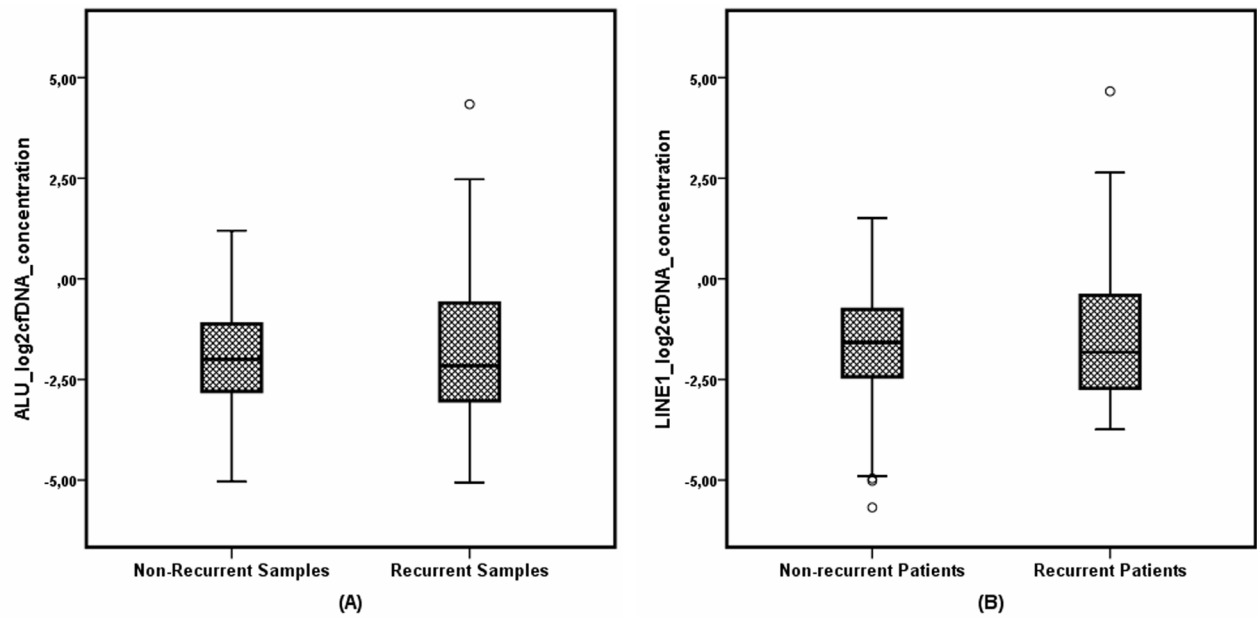

**Supplementary Figure 2:** Box and whisker plots of cell-free DNA concentration in non-recurrent and recurrent BC patients estimated from (A) ALU and (B) LINE1 targets.

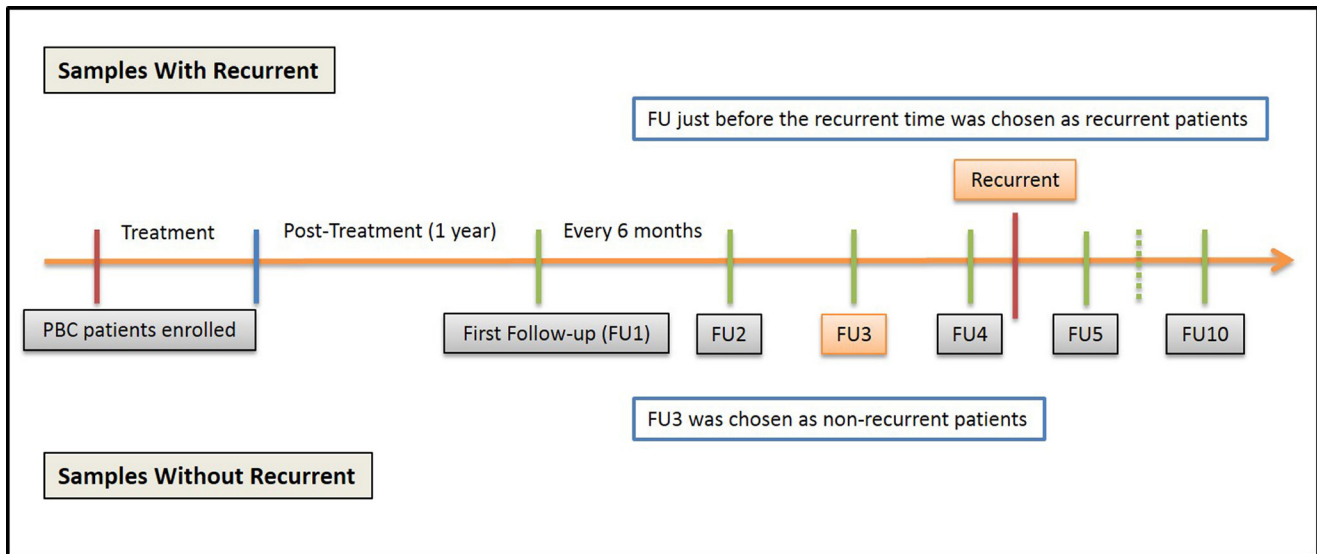

Supplementary Figure 3: The process flow diagram of selected samples.

Supplementary Table 1: Correlation of cfDI and log<sub>2</sub>cfDNA concentration to clinical features in all patients

| Correlation               | Denotation of results. | ALU log <sub>2</sub> DNAconc |              | ALU cfDI |       | LINE1 log <sub>2</sub> DNAconc |              | LINE1 cfDI |              |
|---------------------------|------------------------|------------------------------|--------------|----------|-------|--------------------------------|--------------|------------|--------------|
|                           |                        | Result                       | P            | Result   | P     | Result                         | P            | Result     | P            |
| Age <sup>a</sup>          | ρ value                | 0.171                        | <b>0.013</b> | -0.053   | 0.446 | 0.168                          | <b>0.015</b> | 0.006      | 0.930        |
| Menopause <sup>b</sup>    | ρ value                | 0.121                        | 0.162        | -0.073   | 0.312 | 0.137                          | 0.100        | -0.037     | 0.457        |
| Histotype <sup>d</sup>    | ρ value                | -0.001                       | 0.516        | 0.046    | 0.628 | -0.006                         | 0.733        | -0.003     | 0.844        |
| Grading <sup>b</sup>      | ρ value                | -0.053                       | 0.500        | -0.106   | 0.075 | -0.032                         | 0.533        | -0.166     | <b>0.020</b> |
| Fokal <sup>c</sup>        | uni-multifocal         | 0.077                        | 0.269        | 0.097    | 0.162 | 0.090                          | 0.194        | 0.051      | 0.466        |
| T <sup>c</sup>            | Tis,0,1 vs T2,3,4      | 0.010                        | 0.885        | -0.036   | 0.606 | 0.010                          | 0.089        | -0.009     | 0.896        |
| N <sup>c</sup>            | positive-negative      | 0.021                        | 0.760        | -0.066   | 0.341 | -0.017                         | 0.801        | -0.007     | 0.925        |
| ER <sup>c</sup>           | positive-negative      | 0.099                        | 0.153        | 0.056    | 0.419 | 0.068                          | 0.323        | 0.083      | 0.227        |
| PR <sup>c</sup>           | positive-negative      | 0.095                        | 0.183        | 0.105    | 0.141 | 0.089                          | 0.214        | 0.093      | 0.195        |
| HER2 <sup>c</sup>         | positive-negative      | -0.127                       | 0.071        | 0.034    | 0.627 | -0.198                         | <b>0.004</b> | 0.019      | 0.787        |
| p53 <sup>a</sup>          | ρ value                | 0.074                        | 0.334        | -0.146   | 0.056 | 0.069                          | 0.365        | -0.019     | 0.804        |
| Ki67 <sup>a</sup>         | ρ value                | -0.038                       | 0.579        | -0.071   | 0.301 | -0.053                         | 0.444        | -0.132     | 0.055        |
| OP <sup>c</sup>           | BCT-Mastectomy         | -0.178                       | 0.396        | 0.085    | 0.612 | -0.270                         | 0.363        | -0.025     | 0.443        |
| Radiotherapy <sup>c</sup> | with-without therapy   | 0.101                        | 0.141        | -0.059   | 0.390 | 0.106                          | 0.124        | 0.054      | 0.435        |
| Endotherapy <sup>c</sup>  | with-without therapy   | -0.044                       | 0.522        | 0.003    | 0.971 | -0.101                         | 0.141        | -0.013     | 0.856        |
| Chemotherapy <sup>c</sup> | with-without therapy   | 0.013                        | 0.851        | -0.038   | 0.584 | 0.028                          | 0.684        | -0.127     | 0.065        |

P < 0.05 is highlighted in bold. Tests performed are<sup>a</sup> Spearman correlation permutation test, <sup>b</sup> Jonckheere-Terpstra test, and <sup>c</sup> Wilcoxon rank sum test and <sup>d</sup> Kruskal-Wallis H test, depending on the type of variable. Statistically significant p < 0.05 is indicated in bold.

Abbreviations: cfDI - cell-free DNA integrity, cfDNA - cell-free DNA, conc - concentration, ER - oestrogen receptor, PR - progesterone receptor, HER2 - human epidermal growth factor 2, T - tumor size, N - lymph node status, OP - operation, BCT - breast conserving therapy.

**Supplementary Table 2: Primer sequences of short and long fragments amplified from ALU and LINE1 elements**

|           | <b>Forward Primer</b> | <b>Reverse Primer</b>   | <b>Amplicon Size (bp)</b> | <b>Ta(°C)</b> |
|-----------|-----------------------|-------------------------|---------------------------|---------------|
| ALU-111   | CTGGCCAACATGGTCAAAC   | AGCGATTCTCCTGCCTCAG     | 111                       | 61            |
| ALU-260   | ACGCCTGTAATCCCAGCA    | CGGAGTCTCGCTCTGTCG      | 260                       | 61            |
| LINE1-97  | TGGCACATATACACCATGGAA | TGAGAATGATGGTTTCCAATTTC | 97                        | 65            |
| LINE1-266 | ACTTGGAACCAACCCAAATG  | CACCACAGTCCCAGAGTG      | 266                       | 65            |

Abbreviations: bp – base pair, Ta - annealing temperature.
